# Supplementary material for: A Rapid Caspase-11 Response Induced by IFNγ Priming Is Independent of Guanylate Binding Proteins
Source: PubMed Central journal article supplement — iScience. 2020 Sep 29;23(10):101612. doi: 10.1016/j.isci.2020.101612 (PMC7566093; doi:10.1016/j.isci.2020.101612), 2020-09-29
Supplement: mmc1.pdf [file mmc1.pdf]

iScience, Volume 23

## **Supplemental Information**

### **A Rapid Caspase-11 Response Induced by IFN $\gamma$ Priming Is Independent of Guanylate Binding Proteins**

**Sky W. Brubaker, Susan M. Brewer, Liliana M. Massis, Brooke A. Napier, and Denise M. Monack**

Figure S1

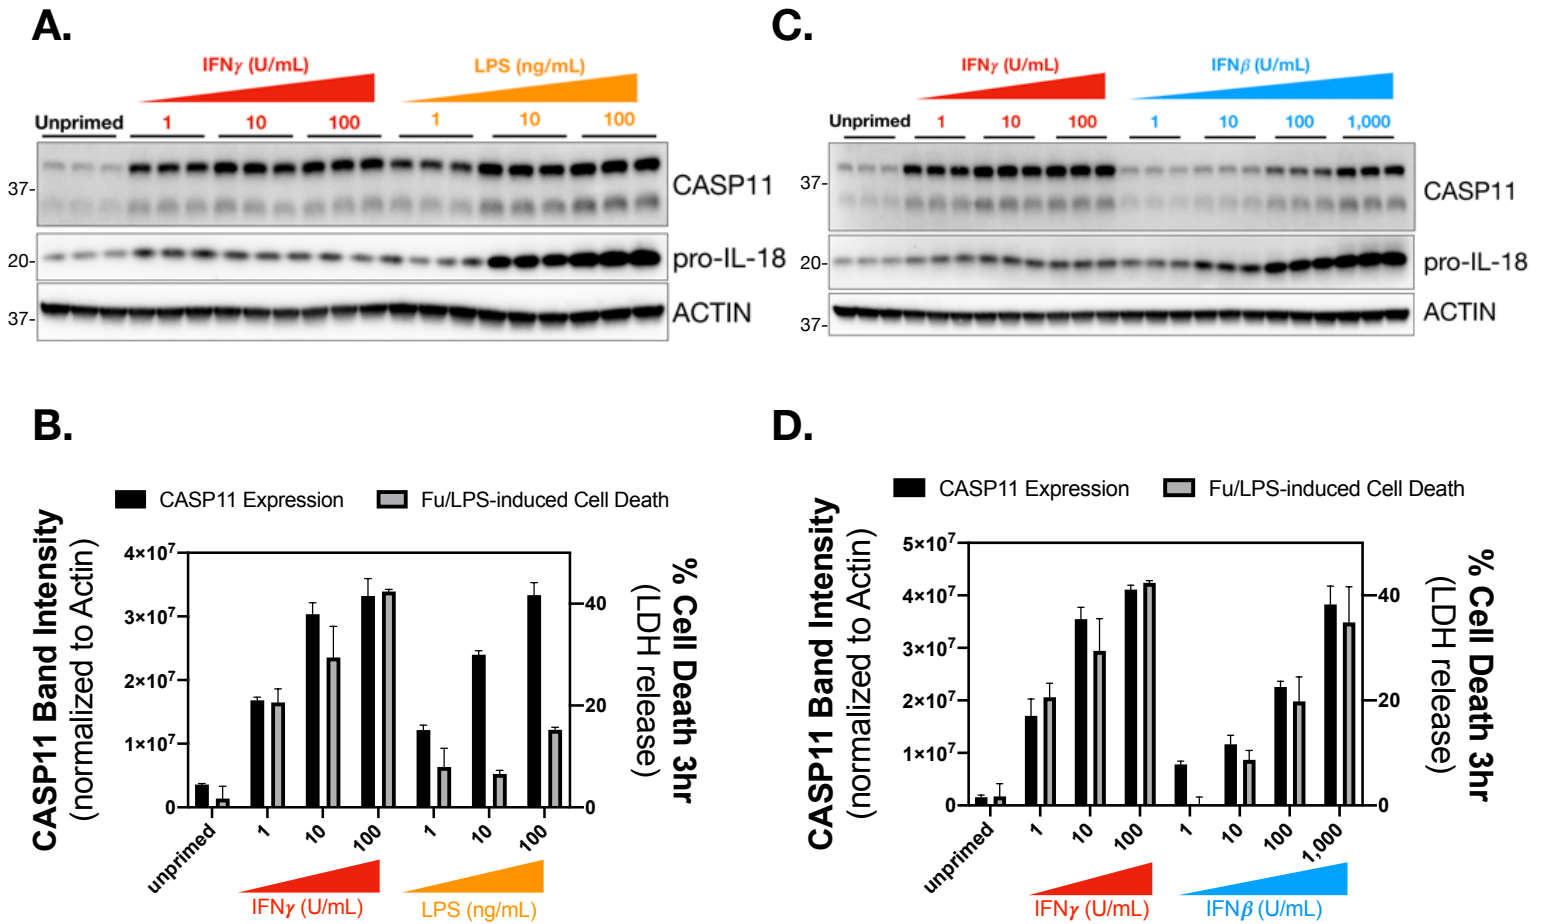

**Figure S1. IFN $\gamma$  is a More Potent Priming Agent for CASP11-dependent inflammasome activation. Related to Figure 1**

WT BMDMs were primed as indicated for 16hrs overnight in technical triplicate and cell lysates were collected to determine the expression levels of CASP11 and pro-IL-18 by Western blot (A,C). In parallel, WT BMDMs were primed as indicated for CASP11 activation by LPS (*E. coli* 0111:B4, 25ug/mL) transfection with FugeneHD (Fu/LPS). At 3hrs following inflammasome activation, supernatants were collected to measure release of LDH for percent cell death calculations. Quantitations of CASP11 expression (from A,C) are compared against Fu/LPS-induced cell death (B,D). Bar graphs in black correspond to the left axis, which represents CASP11 expression as band intensity normalized to ACTIN. Percent cell death at 3 hours following LPS transfection is plotted in grey and corresponds to the right axis. Bar graphs depict the mean  $\pm$  SD using triplicates for each condition. Molecular weight marker positions are shown to the left of each blot. Data are representative of 4 (A,B) or 3 (C,D) independent experiments.

## Figure S2

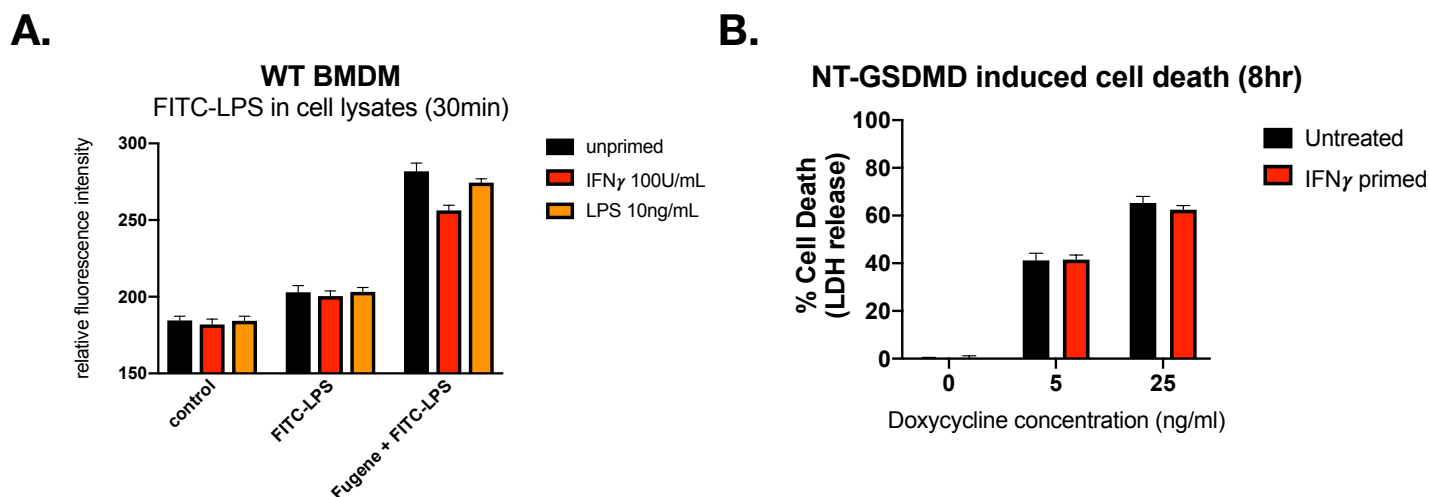

**Figure S2. IFN $\gamma$  Priming Does not Promote Transfection-dependent Delivery of LPS or NT-GSDMD Pore Formation. Related to Figure 2**

(A) Transfection-dependent delivery of LPS was determined using a FITC-labelled LPS conjugate. WT BMDMs were primed for 16hrs overnight with the following treatments; unprimed (N/A), IFN $\gamma$  (100U/mL), or LPS (10ng/mL). The BMDMs were then transfected with a FITC-conjugated LPS (*E. coli* 0111:B4, 25ug/mL) using FugeneHD. Following transfection, cell lysates were collected, and the relative fluorescence intensity of lysates was measured. (B) A Doxycycline-inducible NT-GSDMD cell line was generated in *Gsdmd*-CRISPR/Cas9 KO RAW cells. Prior to Dox-induced expression of NT-GSDMD, cells were treated with or without IFN $\gamma$  (100U/mL) for 16hrs. Following Dox-induced expression of NT-GSDMD, cell death was determined by measuring release of LDH in the supernatant. Bar graphs show the mean value  $\pm$  SD of triplicates (A,B). Data are representative of 2 independent experiments (A,B).

Figure S3

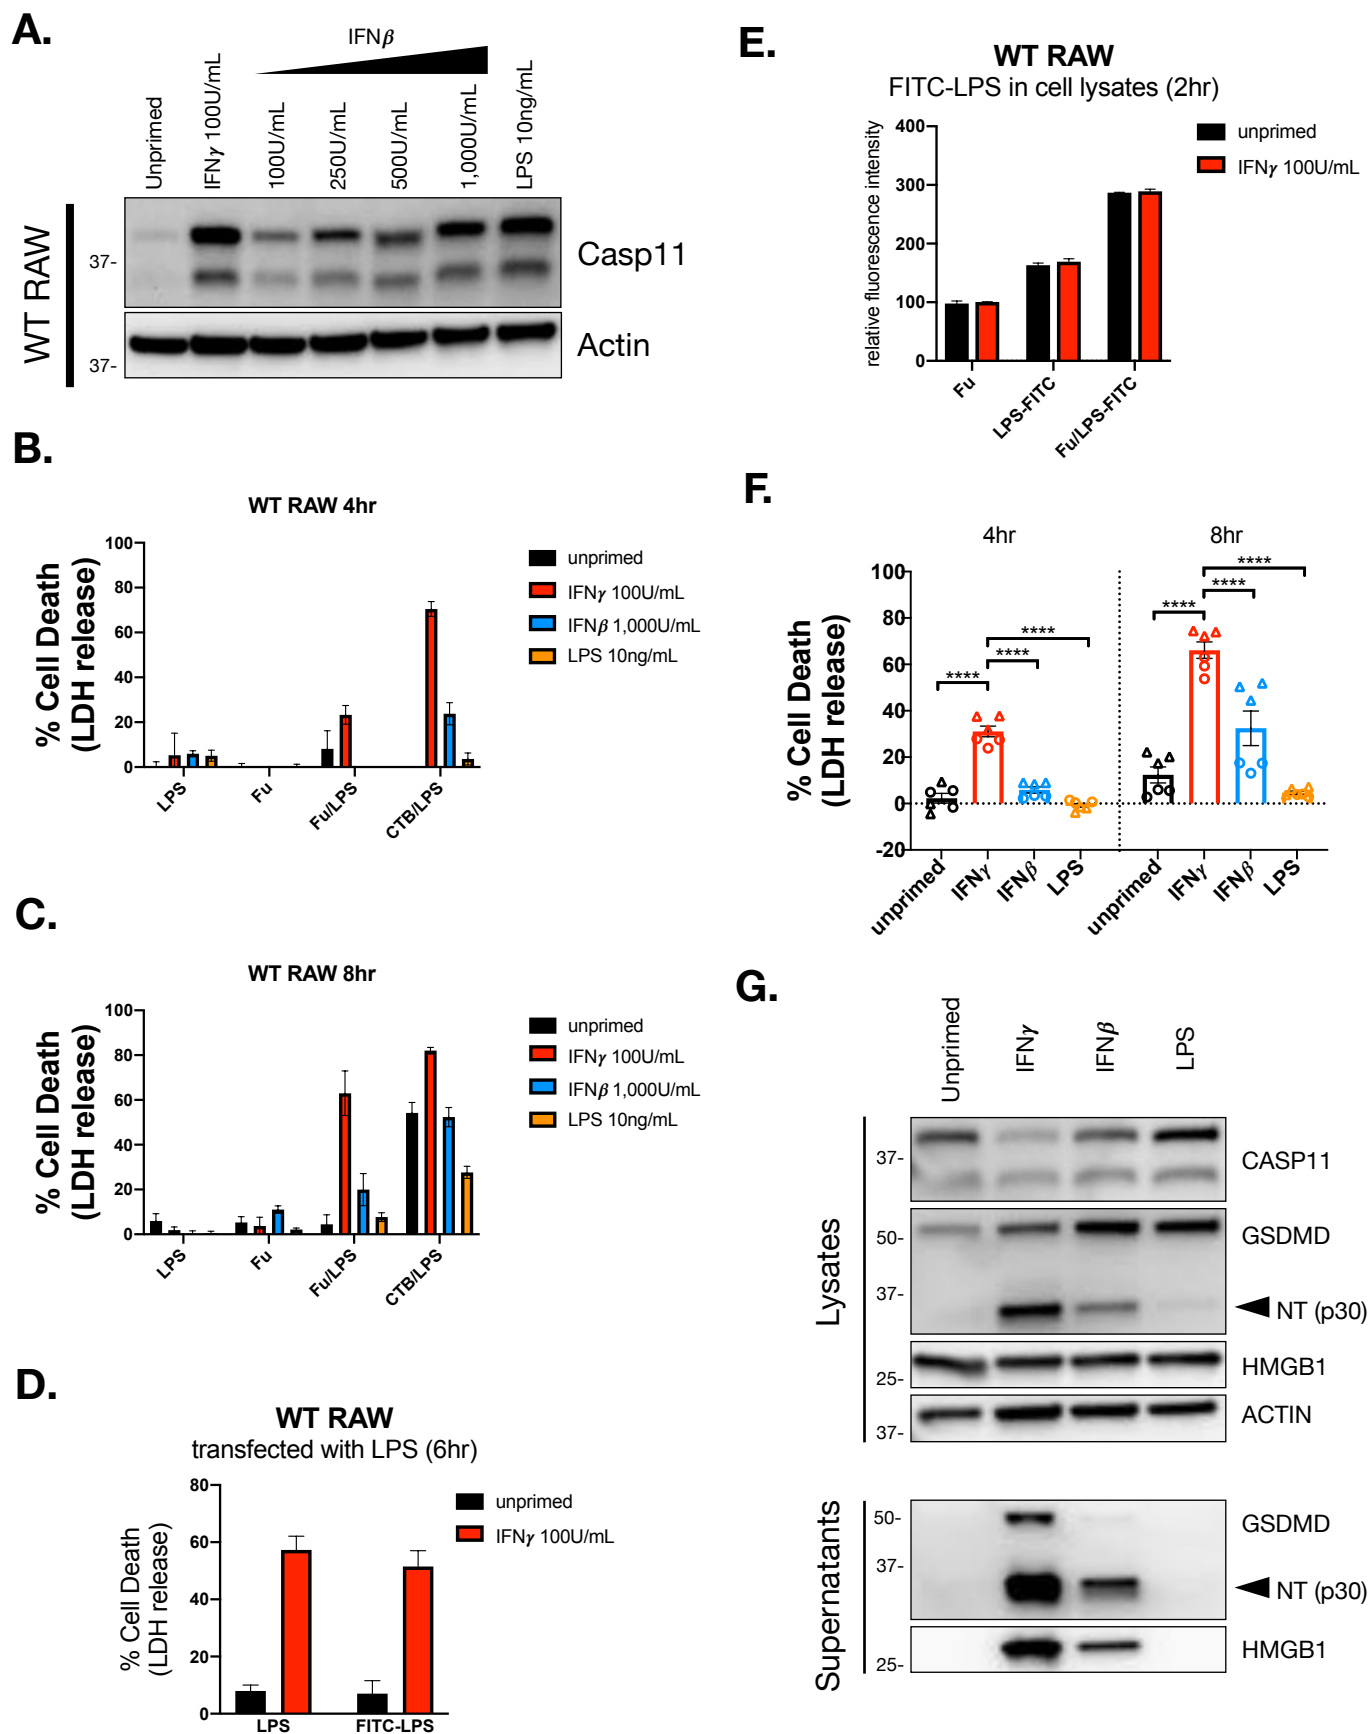

**Figure S3. IFN $\gamma$  Priming Enhances CASP11-dependent Cell Death in RAW 264.7 Independently of CASP11 Expression. Related to Figure 3**

(A) WT RAW 264.7 cells were left unprimed or treated with IFN $\gamma$ , IFN $\beta$ , or LPS at the indicated concentrations for 16hrs and cell lysates were collected to determine the expression of CASP11 by Western blot. (B-C) WT RAW 264.7 cells were primed for 16hrs overnight with the following treatments: unprimed (N/A), IFN $\gamma$  (100U/mL), IFN $\beta$  (1,000U/mL), or LPS (10ng/mL). Cells were treated with LPS (*E. coli* 0111:B4, 25ug/mL), FugeneHD (0.5%), LPS and FugeneHD, or LPS with CTB (Cholera Toxin B Subunit, 20ug/mL). At 4hrs (B) and 8hrs (C) following inflammasome activation, supernatants were collected to measure release of LDH for percent cell death calculations. (D) WT RAW 264.7 cells were left unprimed or treated with IFN $\gamma$  (100U/mL) for 16hrs and CASP11 inflammasome activation was triggered by FITC-conjugated or standard LPS (*E. coli* 0111:B4, 25ug/mL) transfection using FugeneHD. Supernatants were collected to measure release of LDH for percent cell death calculations. (E) Transfection-dependent delivery of LPS was determined using the FITC-labeled LPS conjugate. WT RAW 264.7 cells were primed with or without IFN $\gamma$  (100U/mL) for 16hrs and FITC-LPS was transfected with FugeneHD. Following transfection, cell lysates were collected, and the relative fluorescence intensity of lysates was measured. (F-G) The constitutive CASP11-expressing cell line was primed for 16hrs overnight with the following treatments: unprimed (N/A), IFN $\gamma$  (100U/mL), IFN $\beta$  (1,000U/mL), or LPS (10ng/mL). CASP11 inflammasome activation was triggered with a mixture of LPS (*E. coli* 0111:B4, 50ug/mL) and CTB (20ug/mL). (F) At 4 and 8hrs following inflammasome activation, supernatants were collected to measure release of LDH for percent cell death calculations. (G) Alternatively, supernatants and lysates were collected 6hrs post-transfection to monitor for the cleavage and release of inflammasome-related proteins by SDS-PAGE and Western blot. Molecular weight marker positions are shown to the left of each blot, and arrows indicate a cleavage product. Bar graphs (B-E) show the mean value  $\pm$  SD of technical triplicates and are representative of at least 2 independent experiments. Bar graphs (F) show the mean value  $\pm$  SEM along with individual data points pooled from 2 independent experiments depicted with different shapes. Western blots (A,G) are representative of 2 independent experiments. Statistical analysis performed using a Two-way ANOVA and Tukey's multiple comparisons test; \*\*\*\* < 0.0001

Figure S4

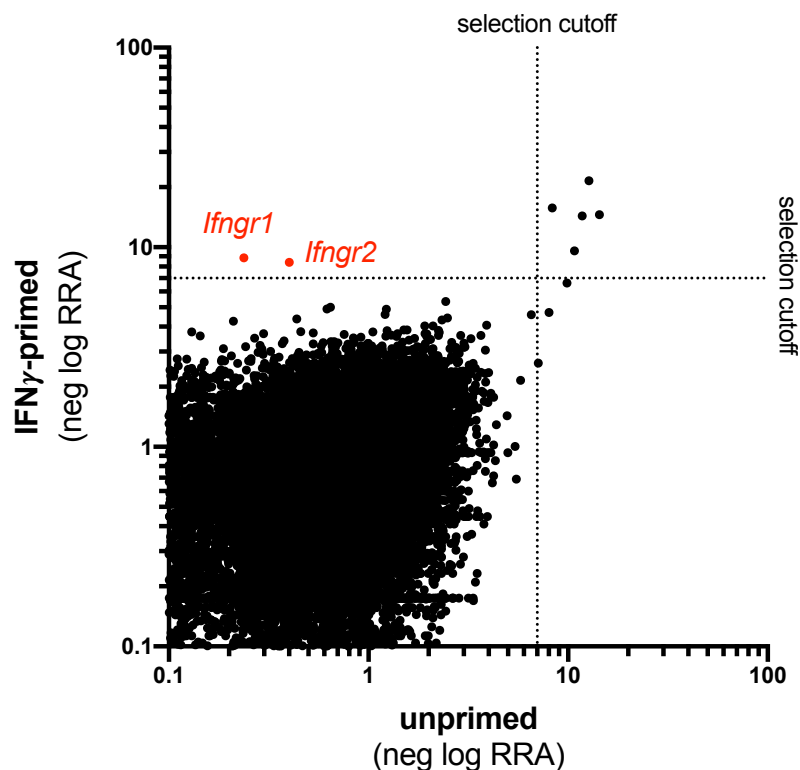

**Figure S4. Genome-wide CRISPR KO Survival Screen Identifies Genes Encoding IFN $\gamma$  Receptor. Related to Figure 4**

We generated a genome-wide CRISPR knockout library in the constitutive CASP11 expressing cells (described in Figure 3) and selected for surviving cell populations following treatment with or without IFN $\gamma$  priming and transfected with LPS. Each axis depicts the enrichment score for gRNAs present in the surviving population calculated using MAGeCK and an arbitrary selection cutoff was made at a negative log RRA enrichment score of 7. Cell populations with gRNAs targeting *Ifngr1* and *Ifngr2* (highlighted in red) were only selected following Casp11 activation with IFN $\gamma$  priming (y-axis) compared with an unprimed selection (x-axis).

Figure S5

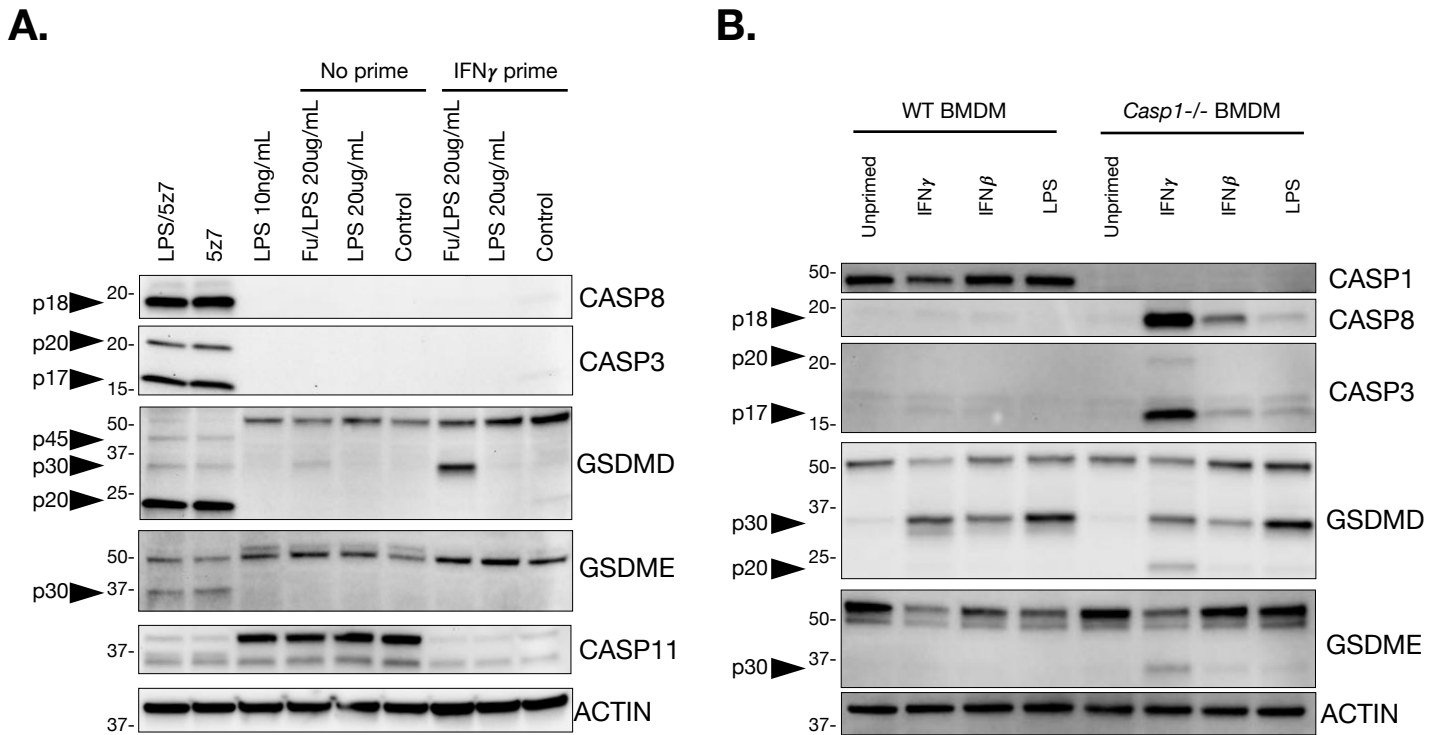

**Figure S5. IFN $\gamma$  Enhancement of CASP11-dependent Cell Death is not Associated with GSDME Cleavage. Related to Figure 5**

(A) Constitutive CASP11-expressing RAW cells (see Figure 3) were primed +/- IFN $\gamma$  for 16hrs and CASP11 activation was triggered by LPS (*E. coli* 0111:B4, 25ug/mL) transfection with EugeneHD. Following transfection (7hrs) cell lysates and supernatants were collected and pooled to determine Caspase and Gasdermin cleavage by Western blot. As a positive control for CASP8, CASP3, and GSDME cleavage, cells were treated with the TAK1 inhibitor 5z7. (B) WT and *Casp1*<sup>-/-</sup> BMDMs were treated with the indicated priming agents for 16hrs and transfected with LPS (*E. coli* 0111:B4, 25ug/mL). Following transfection, cell lysates were collected at 3hrs and analyzed by Western blot to determine Caspase and Gasdermin cleavage. Molecular weight marker positions are shown to the left of each blot, and arrows indicate a cleavage product. Data represent results from single experiments (A-B).

## Figure S6

A.

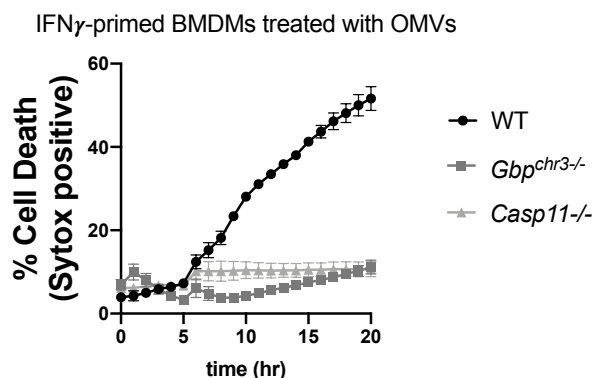

B.

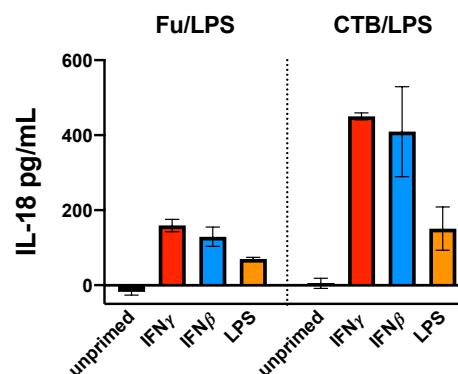

### Figure S6. IFN-Inducible GBPs do not Fully Account for Enhanced CASP11-dependent Cell Death Triggered by IFN $\gamma$ Priming. Related to Figure 6

(A) WT, *Gbp<sup>chr3-/-</sup>*, and *Casp11<sup>-/-</sup>* BMDMs were primed for 16hrs overnight with IFN $\gamma$  (100U/mL) and CASP11 inflammasome activation was triggered by treating cells with OMVs (*E. coli* DH5 $\alpha$ ). Cell death kinetics were monitored over time by measuring the incorporation of SYTOX Green. (B) *Gbp<sup>chr3-/-</sup>* BMDMs were primed for 16hrs overnight with the following treatments: unprimed (N/A), IFN $\gamma$  (100U/mL), IFN $\beta$  (100U/mL), LPS (10ng/mL). CASP11 inflammasome activation was triggered by LPS (*E. coli* 0111:B4, 25ug/mL) transfection with FugeneHD, or LPS (*E. coli* 0111:B4, 25ug/mL) mixed with CTB (Cholera Toxin B Subunit, 20ug/mL). At 3hrs following inflammasome activation, supernatants were collected to measure release of IL-18. Line graph shows the mean value  $\pm$  SEM pooled from 2 independent experiments with technical replicates (A). Bar graph shows the mean value  $\pm$  SD of samples in triplicate from one experiment (B).



1 **Transparent Methods:**

2 Experimental Models

3 *Cell lines and primary cell cultures:*

4 Primary BMDMs were differentiated from flushed femurs as described previously  
5 (Broz and Monack 2013). All animal care and the bone marrow isolation procedures  
6 used in this study for differentiating BMDMs were approved and are in accordance with  
7 the guidelines set out by Stanford University's Administrative Panel on Laboratory  
8 Animal Care (APLAC). Briefly 6-14 week old mice were euthanized and following bone  
9 marrow, isolation cells were cultured in differentiation media: Dulbecco's Modified Eagle  
10 Media (DMEM) containing L-Glutamine 4mM, D-Glucose 25mM, Sodium Pyruvate 1mM  
11 (ThermoFisher catalogue #11995073) supplemented with 10% Fetal Bovine Serum  
12 (FBS) and 20% conditioned media from MCSF-producing 3T3 cells (provided by Anita  
13 Sil UCSF). Differentiation was conducted over 6 days in non-"TC treated" culture plates,  
14 BMDMs were lifted by gentle scraping in ice-cold PBS, and frozen down in cryovials at  
15  $1 \times 10^7$  cells/mL in FBS containing 10% DMSO. MCSF conditioned media from 3T3 cells  
16 was generated by splitting a confluent flask of MCSF-producing 3T3 cells 1:10 in DMEM  
17 containing L-Glutamine 4mM, D-Glucose 25mM, Sodium Pyruvate 1mM (ThermoFisher  
18 catalogue #11995073) supplemented with 10% FBS. Supernatants were collected on  
19 day four and the media was replenished for a second collection on day seven. MCSF  
20 conditioned media from day four and seven were pooled, filter sterilized (0.2  $\mu$ m filter  
21 flask), and stored at -80°C. Both male and female mice were used for BMDM  
22 differentiation. We have not observed inflammasome activation differences *in vitro*

23 between BMDMs isolated from male or female mice. WT C57BL/6NJ (Stock No.  
24 005304) and *Ifngr1*<sup>-/-</sup> (Stock No. 003288) mice were acquired from Jackson Labs,  
25 femurs and/or bone marrow from knockout mice were provided by Vishva Dixit  
26 (*Casp11*<sup>-/-</sup>, *Casp1*<sup>-/-</sup>, *Gsdmd*<sup>-/-</sup>, and *Gsdme*<sup>-/-</sup>), Petr Broz and Igor Brodsky (*Gbp*<sup>chr3</sup><sup>-/-</sup>).

27 RAW 264.7 macrophages are an Abelson murine leukemia virus transformed cell  
28 line derived from male mice and were obtained from ATCC (TIB-71). RAW cells were  
29 cultured in DMEM containing L-Glutamine 4mM, D-Glucose 25mM, Sodium Pyruvate  
30 1mM (ThermoFisher catalogue #11995073) supplemented with 10% FBS.

31

32 *Method Details:*

33 Macrophage treatments:

34 Macrophages were seeded into 96-well (40,000 cells/well) or 6-well (1x10<sup>6</sup>  
35 cells/well) plates with macrophage media: DMEM, containing L-Glutamine 4mM, D-  
36 Glucose 25mM, Sodium Pyruvate 1mM (ThermoFisher catalogue #11995073)  
37 supplemented with 10% Fetal Bovine Serum (FBS) and 10% conditioned media from  
38 MCSF-producing 3T3 cells (see above). Once macrophages adhered to the plate, cells  
39 were primed (16hr) with the indicated priming agents by adding a 1:1 volume of a 2x  
40 working stock diluted in bone marrow macrophage media. In our hands, transfection  
41 efficiency is improved with the use of Opti-MEM media and LDH assays are more  
42 robust with media that does not contain Phenol red. Therefore, all inflammasome  
43 activation assays were carried out in Phenol red-free Opti-MEM (Gibco #11058021 and  
44 referred to as Opti-MEM throughout) to match the optimized conditions for LPS

45 transfection. Prior to transfection (LPS) or treatment (Nigericin, ATP, CTB/LPS, OMV),  
46 macrophage media in the plate was removed and replaced with Opti-MEM. For LPS  
47 transfection in BMDMs and WT RAW 264.7 macrophages, LPS (*E. coli* 0111:B4;  
48 Invivogen LPS-EB VacciGrade Cat #vac-3pelps; 20-25ug/mL final concentration) and  
49 FuGENE HD (0.5-0.6% final concentration) were complexed in Opti-MEM by briefly  
50 vortexing and allowing the solution to incubate for 15-30min at room temperature. The  
51 LPS/FuGENE HD complex was then overlayed in each well containing Opti-MEM. For  
52 transfection in *Casp1, Casp11*-DKO +*Casp11* RAW cells, the same amounts of LPS and  
53 FuGENE HD were used, however the final volume of Opti-MEM was reduced by half to  
54 increase transfection efficiency. For NLRP3 inflammasome activation, ATP (5mM final  
55 concentration) or Nigericin (10uM final concentration) were prepared in Opti-MEM and  
56 added to macrophages in Opti-MEM. For CTB/LPS treatments, LPS (20-25ug/mL final  
57 concentration) and CTB (List Biological Laboratories #104; 20ug/mL final concentration)  
58 were mixed in Opti-MEM by pipetting up and down and allowed to incubate for 15-  
59 30min at room temperature. The CTB/LPS complex was then overlayed on  
60 macrophages in wells containing Opti-MEM. For OMV treatments, *E. coli* derived OMVs  
61 (10uL/well 96well) resuspended in PBS were added to BMDMs in Opti-MEM (see more  
62 on OMV isolation below). As a positive control to activate CASP8/CASP3/Gsdme, cells  
63 were treated with the TAK1 inhibitor (5z7) as described previously (Sarhan et al).  
64 Briefly, 5z7 (125nM) with or without LPS (10ng/mL) in serum-free media was added to  
65 cells for 5hr. Proteins in the supernatant were precipitated with TCA and combined with  
66 cell lysates to determine CASP8/CASP3/Gsdme activation by Western blot(Broz and

67 Monack, 2013). To quantify the amount of LPS delivered to macrophages,  $1 \times 10^6$  cells  
68 were transfected with a FITC-labelled LPS conjugate following the procedure described  
69 above. At the timepoint indicated, the media in each well was removed, cells were  
70 washed twice with 4mL of PBS, lysates were collected in 300uL of RIPA buffer by gently  
71 scraping, and the relative fluorescence intensity for each sample was measured with a  
72 fluorometric plate reader.

73

#### 74 Cell Death assays:

75 Cell death assays were conducted in 96-well format with BMDM or RAW cells  
76 plated at 40,000 cells per well. Media was collected at the indicated timepoints and the  
77 relative amount of LDH was determined using the CytoTox (Promega Cat# G1780)  
78 assay following manufacturer instructions. Alternatively, SYTOX Green (ThermoFisher  
79 Cat# S7020; 20nM) was included in Opti-MEM media added prior to treatment for  
80 inflammasome activation. Following treatment for inflammasome activation, SYTOX  
81 positive cells were enumerated using the IncuCyte S3 Live Cell Analysis Imaging  
82 System. Triton X-100 (0.05% final concentration) was added to a set of control wells  
83 with corresponding priming conditions to generate a total cell count and to calculate  
84 percent cell death ( $\% \text{ cell death} = ((\text{experimental count})/(\text{count from total lysis})) \times 100$ ).

85

#### 86 Protein analysis by Western blot:

87 Macrophages were plated in 6-well format at  $1 \times 10^6$  cells per well. Cell lysates  
88 were collected by removing the media in each well, washing with PBS, and lysing in a

89 low volume (50uL/well) of RIPA buffer containing protease inhibitors (Roche cOmplete  
90 inhibitor cocktail). Protein concentrations were determined by Bradford assay (Pierce  
91 Cat# 23236) according to manufacturer instructions and equal concentrations were  
92 loaded for separation by standard SDS-PAGE. For experiments characterizing released  
93 protein into the supernatant, a TCA precipitation protocol was used as previously  
94 described(Broz and Monack, 2013) and equal fractions were loaded for SDS-PAGE. For  
95 a complete list of the antibodies used for Western Blot in this publication, please refer to  
96 the Key Resource Table.

97

#### 98 Measurement of cytokine release by ELISA:

99 BMDM inflammasome activation for determining cytokine release were  
100 conducted in triplicate within a 96-well format and were plated at 40,000 cells per well  
101 as described above in the Cell Death assays section. Following inflammasome  
102 activation supernatants were collected at the indicated timepoints and stored at -20°C  
103 for future processing. The amount of IL-18 or IL-1 $\beta$  present in the supernatants was  
104 determined with commercially available ELISA kits by following manufacturer  
105 instructions (Invitrogen: IL-18 - Cat# BMS618-3TEN, IL-1 $\beta$  - Cat# 88-7013-88).

106

#### 107 Cell Lines Generated for this Manuscript:

108 RAW 264.7 KO cell lines (*Casp1/11* DKO, *Gsdmd* KO) were generated as  
109 previously described(Napier et al., 2016) and gRNAs are listed in the Key Resource  
110 Table. The cell line reconstituted with constitutive CASP11 expression was generated

111 on the *Casp1/11* DKO background with VSV pseudotyped retroviral constructs  
112 generated in 293T cells. The cDNA encoding CASP11 was isolated from BMDMs  
113 stimulated for 4hrs with LPS (100ng/mL) and cloned into pMSCV-IRES-GFP with  
114 XhoI/NotI. Transduced cells were isolated by FACS based on GFP expression and  
115 clonal populations were isolated. Untagged mouse NT-GSDMD PCR-amplified from  
116 Flag-GSDMD was Gibson cloned (NEB) into the pLenti CMVTRE3G Puro DEST  
117 inducible expression system using the EcoRV site. The cloned construct was introduced  
118 into *Gsdmd*-CRISPR/Cas9 KO RAW cells stably expressing the reverse tetracycline  
119 repressor-VP16 transactivator fusion protein pLenti CMV rtTA3G Blast using lentiviral  
120 delivery. Stable transductants were selected with puromycin and dilution plating was  
121 used to isolate the *Gsdmd*-CRISPR/Cas9 KO RAW Tet-On-NT-GSDMD clonal cell line.

122

### 123 Genome-wide CRISPR screen:

124 Our genome-wide CRISPR screen was conducted in the cell line that was  
125 created to constitutively express CASP11 (See above). Cells were stably transduced  
126 with lentiCas9-Blast (Addgene plasmid #52962) and selected with blasticidin to  
127 generate cells constitutively expressing Cas9. Lentiviral production of the Mouse  
128 CRISPR Knockout Pooled gRNA Library(Sanjana et al., 2014) (GeCKO V2; Addgene  
129 Cat# 1000000053) was generated by co-transfecting 150 million 293FT cells with a  
130 mixture of the plasmid library, ΔVPR, VSV-G, pAdVantage packaging plasmids and  
131 EugeneHD. Lentiviral-containing supernatants were pooled from the total 293FT cell  
132 populations on day two and three following transfection, passed through a 0.45uM filter,

133 and stored at 4°C. This pooled lentiviral gRNA library was used to transduce a total of  
134 400 million constitutive CASP11-, Cas9-expressing cells at a MOI of 0.3 along with  
135 protamine sulfate (1ug/mL). Three days following transduction, cells containing the  
136 lentiviral gRNA constructs were selected with a five-day course of puromycin (5ug/mL).  
137 Each screen was conducted with a starting population of >100 million cells of the pooled  
138 gRNA library population to ensure sufficient knockout diversity by having an estimated  
139 >500-fold coverage of each gRNA in the library. For each screen two rounds of  
140 selection were conducted consisting of: 1) +/- IFN $\gamma$  priming 2) LPS transfection to  
141 activate CASP11 inflammasome 3) a recovery period. Briefly, cells were treated +/-  
142 IFN $\gamma$  (100 U/mL) for 16hrs in DMEM supplemented with 10%FBS and then the media  
143 was replaced with Opti-MEM just prior to LPS transfection. To trigger CASP11  
144 inflammasome activation, LPS (*E. coli* 0111:B4, InvivoGen) was complexed with  
145 FuGENE HD and transfected into the knockout library. Following transfection, Opti-  
146 MEM media containing LPS and FuGENE HD were removed and replaced with fresh  
147 DMEM 10% FBS once a substantial level of cell death was observed by eye. Cells  
148 surviving the CASP11 activation were allowed to expand prior to a second round of  
149 selection or prior to collection for isolating genomic DNA. An untreated starting  
150 population of the mutagenized library was used as the unselected reference for each  
151 screen. Total genomic DNA was isolated from the surviving cell populations as well as  
152 from the untreated starting population using QIAamp DNA MiniKits (Qiagen). Two  
153 rounds of PCR were used to amplify the gRNA sequences from each population and  
154 append barcodes for next-generation sequencing by MiSeq (Illumina). Finally, the

155 previously described MAGeCK algorithm was used to analyze our sequencing results  
156 and generate enrichment scores for each gRNA(Li et al., 2014).

157

158 OMV isolation:

159 E. coli DH5α was grown for 8 hours in LB broth at 200 rpm at 37°C. This starter  
160 culture was then back-diluted 1:1000 into 200 ml LB and grown shaking at 200 rpm  
161 overnight at 37°C. Bacteria were removed by pelleting at 5000 xg for 15 minutes, and  
162 the supernatant was passed through a 0.2 μm filter. OMVs were isolated by centrifuging  
163 the filtered supernatant in thick-wall polycarbonate tubes (Beckman Coulter Catalog No.  
164 355631) in a Type 70 Ti rotor in an Optima L-90K ultracentrifuge (Beckman Coulter) at  
165 149,000 xg at 4°C for 3 hours. Following centrifugation, the supernatant was removed  
166 and the resulting OMV pellet was resuspended in cell culture-grade 1x PBS pH 7.4  
167 (final concentration = 440x concentrated from culture broth). The resuspended OMVs  
168 were then passed through a 0.2 μm filter and stored at -80°C. This process was  
169 repeated to generate three batches of OMVs. Prior to addition to mammalian cells, the  
170 three batches were combined in a ratio of 1:1:1.

171

172 *Quantification and Statistical Analysis:*

173 Statistical calculations were conducted using GraphPad Prism software program.  
174 Two-way ANOVA statistical tests were conducted with multiple comparisons as  
175 indicated in each figure legend.

176



177 References:

- 178 BROZ, P. & MONACK, D. M. 2013. Measuring inflammasome activation in response to  
179 bacterial infection. *Methods Mol Biol*, 1040, 65-84.
- 180 LI, W., XU, H., XIAO, T., CONG, L., LOVE, M. I., ZHANG, F., IRIZARRY, R. A., LIU, J.  
181 S., BROWN, M. & LIU, X. S. 2014. MAGECK enables robust identification of  
182 essential genes from genome-scale CRISPR/Cas9 knockout screens. *Genome*  
183 *Biol*, 15, 554.
- 184 NAPIER, B. A., BRUBAKER, S. W., SWEENEY, T. E., MONETTE, P., ROTHMEIER, G.  
185 H., GERTSVOLF, N. A., PUSCHNIK, A., CARETTE, J. E., KHATRI, P. &  
186 MONACK, D. M. 2016. Complement pathway amplifies caspase-11-dependent  
187 cell death and endotoxin-induced sepsis severity. *J Exp Med*, 213, 2365-2382.
- 188 SANJANA, N. E., SHALEM, O. & ZHANG, F. 2014. Improved vectors and genome-wide  
189 libraries for CRISPR screening. *Nat Methods*, 11, 783-4.
- 190

## KEY RESOURCES TABLE

| REAGENT or RESOURCE                                    | SOURCE                       | IDENTIFIER                           |
|--------------------------------------------------------|------------------------------|--------------------------------------|
| <b>Antibodies</b>                                      |                              |                                      |
| Mouse monoclonal anti-beta-Actin                       | Sigma-Aldrich                | Cat# A1978,<br>RRID:AB_476692        |
| Rabbit polyclonal anti-Caspase1 p10                    | Santa Cruz<br>Biotechnology  | Cat# sc-514,<br>RRID:AB_2068895      |
| Rabbit polyclonal anti-Cleaved Caspase3                | Cell Signaling<br>Technology | Cat# 9661,<br>RRID:AB_2341188        |
| Rabbit monoclonal anti-Cleaved Caspase8                | Cell Signaling<br>Technology | Cat# 8592,<br>RRID:AB_10891784       |
| Rat monoclonal anti-Caspase11 (clone 17D9)             | Sigma-Aldrich                | Cat# C1354,<br>RRID:AB_258736        |
| Rabbit polyclonal anti-GBP2                            | Proteintech                  | Cat# 11854-1-AP,<br>RRID:AB_2109336  |
| Rabbit monoclonal anti-GSDMD                           | Abcam                        | Cat# ab209845,<br>RRID:AB_2783550    |
| Rabbit monoclonal anti-GSDME                           | Abcam                        | Cat# ab215191,<br>RRID:AB_2737000    |
| Rabbit monoclonal anti-HMGB1                           | Abcam                        | Cat# ab79823,<br>RRID:AB_1603373     |
| Goat polyclonal anti-IL-1 $\beta$                      | R&D Systems                  | Cat# AF-401-NA<br>RRID:AB_416684     |
| Rabbit monoclonal anti-IL-18                           | Abcam                        | Cat# ab207323                        |
| Mouse monoclonal anti-NLRP3                            | AdipoGen                     | Cat# AG-20B-0014,<br>RRID:AB_2490202 |
| <b>Biological Samples</b>                              |                              |                                      |
| LPS VacciGrade Lipopolysaccharide from E. coli 0111:B4 | InvivoGen                    | Cat# vac-3pelps                      |
| Cholera Toxin B Subunit in Low Salt                    | List Biological Labs         | Cat# 104                             |
| <b>Chemicals, Peptides, and Recombinant Proteins</b>   |                              |                                      |
| Recombinant IFN $\gamma$ Mouse Protein                 | ThermoFisher<br>Scientific   | Cat# PMC4031                         |
| Recombinant IFN $\beta$ 1 Mouse Protein                | BioLegend                    | Cat# 581302                          |
| FuGENE HD transfection reagent                         | Promega                      | Cat# E2311                           |
| SYTOX Green Nucleic Acid Stain                         | ThermoFisher<br>Scientific   | Cat# S7020                           |
| Opti-MEM, no phenol red                                | ThermoFisher<br>Scientific   | Cat# 11058021                        |
| Nigericin                                              | InvivoGen                    | Cat# tlr1-nig                        |
| ATP                                                    | InvivoGen                    | Cat# tlr1-atpl                       |
| (5Z)-7-Oxozeaenol (5z7)                                | Sigma-Aldrich                | Cat# 499610                          |
| <b>Critical Commercial Assays</b>                      |                              |                                      |
| CytoTox 96 Non-Radioactive Cytotoxicity Assay          | Promega                      | Cat# G1780                           |
| IL-1 $\beta$ Mouse Uncoated ELISA Kit                  | Invitrogen                   | Cat# 88-7013-88                      |
| IL-18 Mouse ELISA Kit                                  | Invitrogen                   | Cat# BMS618-3TEN                     |
| <b>Experimental Models: Cell Lines</b>                 |                              |                                      |
| RAW 264.7                                              | ATCC                         | Cat# TIB-71                          |

|                                                                                                                                                                      |                                         |                                        |
|----------------------------------------------------------------------------------------------------------------------------------------------------------------------|-----------------------------------------|----------------------------------------|
| Constitutive CASP11 expressing cell line:<br><i>Casp1, Casp11</i> CRISPR DKO +CASP11                                                                                 | This manuscript                         |                                        |
| Experimental Models: Mouse Strains for BMDM isolation                                                                                                                |                                         |                                        |
| WT C57BL/6NJ                                                                                                                                                         | Jackson Labs                            | Stock No. 005304                       |
| <i>Ifngr1</i> <sup>-/-</sup>                                                                                                                                         | Jackson Labs                            | Stock No. 003288                       |
| <i>Casp1</i> <sup>-/-</sup>                                                                                                                                          | Gift of Vishva Dixit                    |                                        |
| <i>Casp11</i> <sup>-/-</sup>                                                                                                                                         | Gift of Vishva Dixit                    |                                        |
| <i>Gsdmd</i> <sup>-/-</sup>                                                                                                                                          | Gift of Vishva Dixit                    |                                        |
| <i>Gsdme</i> <sup>-/-</sup>                                                                                                                                          | Gift of Vishva Dixit                    |                                        |
| <i>Gbp</i> <sup>chr3</sup> <sup>-/-</sup>                                                                                                                            | Gift of Petr Broz and Igor Brodsky      |                                        |
| Oligonucleotides                                                                                                                                                     |                                         |                                        |
| gRNA Casp1: TGTCTCTAAAAAAGGGCCCC                                                                                                                                     | Napier et al 2016                       |                                        |
| gRNA Casp11: CTGAACGCAGTGACAAGCGT                                                                                                                                    | Napier et al 2016                       |                                        |
| gRNA Gsdmd: TCGTGGGGATGACCTGTTTG                                                                                                                                     | GeCKO V2 library<br>Sanjana et al. 2014 |                                        |
| Primer pair to clone constitutive Casp11:<br>fwd-<br>AAAACCTCGAGACTCTGTCAAGCTGTCTTACGGT<br>rev-<br>AAAAGCGGCCGCTCAGTTGCCAGGAAAGAGGTAGA<br>AATAT                      | This manuscript                         |                                        |
| Primer pair to clone NT-Gsdmd:<br>fwd-<br>CAGTGTGGTGGAAATTCTGCAGATGCCACCATGCCA<br>TCGGCCTTTGAGAAAG<br>rev-<br>GCGGCCGCCACTGTGCTGGATCTAATCTGACAGGA<br>GACTGAGCTGCTTTC | This manuscript                         |                                        |
| Recombinant DNA                                                                                                                                                      |                                         |                                        |
| Plasmid: MSCV-IRES-GFP                                                                                                                                               | Addgene                                 | Plasmid # 20672;<br>RRID:Addgene_20672 |
| Plasmid: pLenti CMVTRE3G Puro DEST                                                                                                                                   | Addgene                                 | Plasmid # 27565;<br>RRID:Addgene_26429 |
| Plasmid: pLenti CMV rTA3G Blast                                                                                                                                      | Addgene                                 | Plasmid # 26429;<br>RRID:Addgene_26429 |
| Plasmid: Flag-Gsdmd                                                                                                                                                  | Addgene                                 | Plasmid # 80950;<br>RRID:Addgene_80950 |
| Plasmid: lentiCas9-Blast                                                                                                                                             | Addgene                                 | Plasmid #52962;<br>RRID:Addgene_52962  |
| Plasmid: Mouse CRISPR Knockout Pooled Library (GeCKO v2)                                                                                                             | Addgene;<br>Sanjana et al. 2014         | Cat #1000000053                        |
| Software and Algorithms                                                                                                                                              |                                         |                                        |
| Prism8                                                                                                                                                               | GraphPad                                |                                        |
| MAGeCK                                                                                                                                                               | Li et al. 2014                          |                                        |
